# Supplementary material for: Effectiveness of ultrasound-guided percutaneous transhepatic biliary drainage to reduce radiation exposure: A single-center experience
Source: PLoS One. 2022 Nov 4;17(11):e0277272. doi: 10.1371/journal.pone.0277272 (PMC9635691; doi:10.1371/journal.pone.0277272)
Supplement: S1 File — (XLSX) [file pone.0277272.s001.xlsx]

## Sheet: Raw data
ID	Gender	Age	Approach	Diagnosis	malignancy (1), benign (2)	Fluoroscopy time (seconds)	Total DAP (mGycm2)	IHD dilatation (non-dilated bile duct: 1; dilated bile duct: 2)	Procedural time (minutes)	Numbers of liver capsule puncture	ERCP (0: not performed; 1: performed)	Plt ( 130~400 x 10^3)	INR (0.8~1.2)	Anticoagulant or Antiplatelet agent	management	Bilirubin (pre)	Bilirubin (post)	Follow up duration (days)	AST (pre)	AST (post)	ALT (pre)	ALT (post)	GTP (pre)	GTP (post)	CRP (pre)	CRP (Post)	WBC (pre)	WBC (post)	Complications
0000271662	F	94	L	Lymphoma	1	597	12651	1	25	3	0	139	1.24			2.7	1.39	7	66	31	15	12	196	78	123.8	29.2	8.03	5.46
0000266314	M	55	R	Bile leakage, diversion	2	186	2296	1	9	1	0	90	1.09			0.53	0.52	1	33	23	26	19	67	42	0.2	109.2	4.3	4.78
0000188749	M	48	R	CBD stone	2	118	2867	1	8	1	0	211	0.87			1.62	0.66	3	43	19	67	18	197	106	104.3	19	12.84	9.34	Hemobilia
0000268708	M	50	R	Bile leakage, diversion	2	514	14452	1	23	3	0	217	1.62		Transfusion	0.87	0.86	1	43	44	37	51	117	91	300	79	19.43	9.57
0000271662	F	94	R	Lymphoma	1	385	10315	1	15	2	0	236	1.06			4.53	2.7	8	243	66	103	15	1279	196	48.9	123.8	4.9	3.1	Subcapsular biloma
0000272029	F	66	R	CBD stone	2	119	4672	1	5	1	1	266	1.08			3.27	1.23	2	486	34	397	110	378	253	108.4	174.3	29.93	14.14
0000041670	M	68	R	CBD stone	2	350	19423	1	8	1	1	255	1.1			3.97	2.62	4	105	168	246	160	677	584	94.7	15.3	6.98	4.73
0000251975	M	78	R	Malignant GIST	1	50	3265	1	2	1	0	257	0.94			6.41	1.83	4	127	93	414	160	780	409	81.3	52.9	8.3	6.87
0000271186	M	73	L	CBD stone	2	446	9221	1	16	2	0	130	1.03			4.34	0.79	5	142	16	129	22	650	302	52.3	32.4	11.69	6.46
0000270736	F	95	R	R/O biliary sepsis	2	758	13460	1	25	3	0	144	1.17			3.33	2.33	1	295	342	136	233	199	151	51	84	13.41	16.65
0000153302	F	86	R	CBD stone	2	82	2001	1	3	1	1	100	1.03			1.26	3.45	2	51	24	65	36	93	69	121.6	115.9	6.62	4.8
0000045738	F	66	R	Acute cholangitis, pneumobilia	2	448	10653	1	16	2	0	235	1.05			1.15	0.54	3	315	55	235	99	735	641	70.8	45.9	12.71	4.39
0000268402	M	78	R	CBD stone	2	406	7344	1	13	2	1	144	1.1			7.96	1.47	7	310	39	336	25	433	110	200.2	44.1	25.26	17.02
0000226626	M	78	R	Cholangitis	2	133	2407	1	10	2	0	352	1.09			0.52	0.42	2	34	19	24	18	62	45	91.4	97.4	10.84	5.22
0000184054	M	88	R	CBD stone	2	163	4071	1	7	1	1	146	1.07			0.92	0.71	1	189	76	49	51	127	110	10	257.4	7.67	19.66
0000024056	M	66	R	CBD stone, hemobilia work up	2	69	2318	2	3	1	1	175	1.48			4.19	0.95	5	234	33	229	80	378	251	1.5	5.3	6.43	5.25
0000256450	F	69	R	GB cancer recur	1	222	6626	2	7	1	0	110	1.03			2.42	1.1	5	119	55	271	102	380	214	161	31.9	9.17	8.75
0000221886	M	79	L	CBD cancer	1	58	2238	2	2	1	0	122	1.07			25.34	14.4	6	39	35	14	8	79	44	17.4	25	12.68	11.66	Fever
0000191035	F	74	R	CBD stone	2	157	3120	2	4	1	1	166	1.24	aspirin & clopidogrel	Hold the drugs	1.94	0.58	3	562	25	621	143	314	147	134.4	77	9.55	6.8
0000270553	F	33	R	CBD stone	2	114	2589	2	5	1	0	641	0.98			2.22	0.95	2	106	43	109	56	560	330	58.2	43	7.99	8.24
0000143748	M	77	R	CBD dilatation (R/O cholangitis)	2	102	2255	2	4	1	0	95	1.24			0.57	0.51	2	31	51	7	14	12	23	104.4	246.3	7.13	3.47
0000143317	M	52	L	CBD stone	2	161	4529	2	7	1	1	89	1.56			3.91	1.49	13	100	96	60	51	58	41	139.5	5.8	29.76	4.55
0000268927	F	83	R	Cholangiocarcinoma	1	149	5845	2	6	1	0	125	1.45			5.31	1.2	4	807	69	338	59	242	111	105.9	49.9	12.53	3.85
0000268751	M	63	R	Pancreas cancer	1	154	2447	2	4	1	0	438	1.15			17.33	5.16	3	625	191	690	285	2000	1086	25.9	120	13.77	13.75	Fever
0000264708	M	84	R	CBD stone	2	161	2421	2	4	1	0	385	0.94	aspirin & clopidogrel	Hold the drugs	0.85	0.67	2	31	26	37	23	817	578	5.4	2.8	7.55	6.31
0000255526	F	72	R	GB cancer with liver metastasis	1	240	5029	2	8	1	0	424	1			7.43	2	4	175	110	27	58	646	608	18.4	28.9	6.51	4.35
0000263944	M	73	R	CBD stone	2	115	4386	2	6	1	0	153	1.35			12.85	2.06	9	195	103	127	30	832	267	95.2	9.5	7.79	7.99
0000259982	M	84	R	CBD stone	2	141	2610	2	6	1	1	133	1.28			4.14	0.92	7	329	21	214	17	104	47	83.2	30.6	3.99	3.67
0000222795	M	59	L	Pancreas cancer	1	139	5397	2	4	1	0	143	1.11			10.37	2.03	10	118	43	135	17	724	269	177	189.8	18.08	17.68
0000260954	F	80	R	Cholangiocarcinoma	1	176	5164	2	5	1	0	157	1.18			19.89	19.19	1	154	151	24	25	158	137	22.9	39.3	5.94	7.12
0000262169	M	54	R	Pancreas cancer	1	132	1460	2	4	1	0	296	1.05	aspirin	Hold the drugs	23.6	7.83	7	242	37	266	41	1008	436	10.8	16.6	8.04	9.51
0000220440	M	84	R	GB empyema	2	128	2082	2	4	1	0	139	0.98	aspirin & plavix	Hold the drugs	2.25	1.07	5	72	19	60	20	121	78	94.4	45	7.87	4.84
0000260022	F	87	L	CBD stone	2	87	5901	2	2	1	0	232	1.45			1.74	1.34	1	124	202	70	173	125	89	300	300	3.7	3.8
0000259392	F	88	L	CBD stone	2	205	3833	2	7	1	0	92	1.71			1.71	0.89	6	227	16	46	10	237	165	146.3	79.5	16.54	9.8
0000109872	F	80	R	Distal CBD cancer	1	84	2486	2	4	1	0	224	0.9			28	6.88	7	137	47	97	17	897	386	173.1	130.4	6.1	6.14
0000045738	F	66	L	Acute cholangitis, pneumobilia	2	227	9524	2	7	1	0	202	0.98			0.98	0.55	2	172	67	87	63	560	245	60.3	92.4	9.51	7.65
0000272206	F	93	R	CBD stone	2	227	5218	2	7	1	1	220	1.21			3.34	1.06	2	159	60	48	35	268	193	134.9	174.5	14.2	13.1
0000265440	M	72	L	Klatkin tumor	1	219	7499	2	6	1	0	791	1.22			3.65	1.79	20	60	40	28	12	169	185	66.7	7	16.24	10.33
0000271382	F	93	R	CBD stone	2	280	4556	2	10	2	0	29	1.38		Transfusion	7.52	4.75	2	119	186	101	93	121	54	152.7	13	5.26	5.28	Hemobilia
0000271193	F	72	L	Bladder cancer with peritoneal metastasis	1	65	2143	2	4	1	0	205	1.11			13.15	6.23	3	114	28	133	54	739	519	146.4	33.2	17.79	14.41
0000267690	M	69	R	AoV cancer	1	154	4096	2	7	1	0	222	0.98			8.66	3.32	3	215	42	435	179	679	389	22.4	99.7	11.4	7.01
0000097315	F	73	R	CBD cancer	1	163	6568	2	6	1	0	55	1.46			5.59	2.59	3	71	49	18	19	333	279	227.6	34.5	3.31	3.45
0000209962	M	63	R	Klatkin tumor	1	160	2237	2	7	1	0	300	1.18			1.01	1.97	3	53	30	13	7	387	258	242	186.2	16.36	18.45
0000267897	M	81	R	Acute cholangitis	2	130	5534	2	5	1	0	135	1.15			5.11	1.19	8	131	26	315	45	234	135	124	19.6	10.54	9.05
0000265368	M	63	R	Cholangiocarcinoma	1	100	4181	2	4	1	0	358	1.04			21.49	11.71	12	55	81	39	23	88	57	22.1	18.9	10.08	9.47
0000265368	M	63	L	Cholangiocarcinoma	1	100	4181	2	3	1	0	358	1.04			21.49	11.71	12	55	81	39	23	88	57	22.1	18.9	10.08	9.47
0000264640	F	82	L	Klatkin tumor	1	216	3029	2	7	1	0	357	1.03			14.51	2.9	12	95	300	117	28	694	314	146.7	3.3	13.37	16.17
0000257592	M	81	R	gastric cancer with direct invasion	1	152	1813	2	6	1	0	195	1.57		Transfusion	11.69	9.29	3	52	66	31	42	352	187	151.7	103.2	13.59	8.08
0000260954	F	80	L	Cholangiocarcinoma	1	163	2934	2	6	1	0	230	1.14			26.5	19.89	10	147	154	84	24	337	158	23.5	39.3	6.4	5.94
0000271193	F	72	R	Bladder cancer with peritoneal metastasis	1	226	5640	2	7	1	0	203	1.11			10.4	10.3	1	48	44	32	30	409	345	205.2	194.7	21.45	20.41
